# Supplementary material for: Evolutionary conservation of the DRACH signatures of potential N6-methyladenosine (m6A) sites among influenza A viruses
Source: PubMed Central journal article supplement (PMC7907337; doi:10.1038/s41598-021-84007-0), 2021-02-25
Supplement: 41598_2021_84007_MOESM1_ESM.pdf [file 41598_2021_84007_MOESM1_ESM.pdf]

# Evolutionary Conservation of the DRACH signatures of potential N6-methyladenosine (m<sup>6</sup>A) sites Among Influenza A Viruses

Mahmoud Bayoumi and Muhammad Munir\*

Division of Biomedical and Life Sciences, Lancaster University, Lancaster, LA1 4YG, United Kingdom

## \*Correspondence:

Email: [muhammad.munir@lancaster.ac.uk](mailto:muhammad.munir@lancaster.ac.uk); Tel: +44 (0)1524 595083

## Supplementary figures:

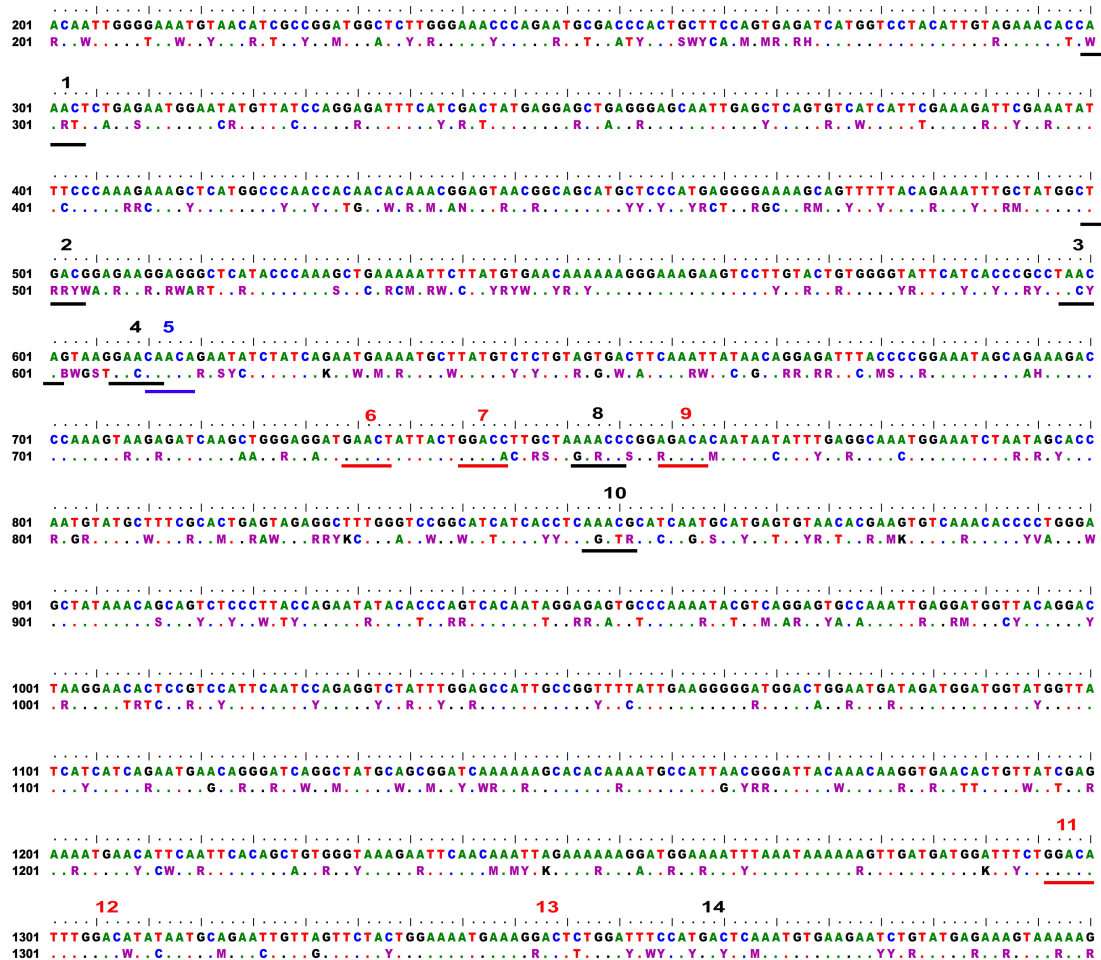

**Supplementary Figure 1:** DRACH motifs comparison between IAV-PR8 HA mRNA and the consensus sequence of the H1 subtype. Sequence alignment of the IAV-PR8 HA transcripts and consensus H1 with threshold frequency 85% are indicated. Nucleotide numbers are indicated on the left side. The alignment was generated using the Clustal W algorithm of the

MegAlign program (Lasergene, version 3.18). The conserved DRACH motifs indicated by red underlines and numbers, the non-conserved DRACH motifs indicated by black underlines and numbers, atypical 5<sup>th</sup> DRACH motif represented by blue underline. Identical residues are indicated by dots and sequence variation is denoted by a typical single-letter code or IUPAC degenerate nucleotide codes; R denotes A or G, Y denotes C or T, S denotes G or C, W denotes A or T, K denotes G or T, M denotes A or C, B denotes C or G or T, D denotes A or G or T, H denotes A or C or T, V denotes A or C or G.

A

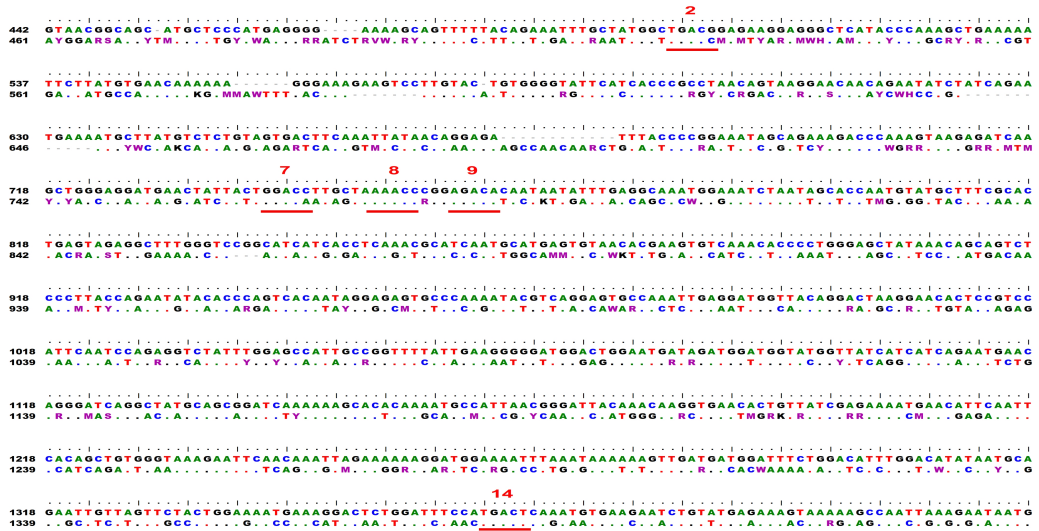

B

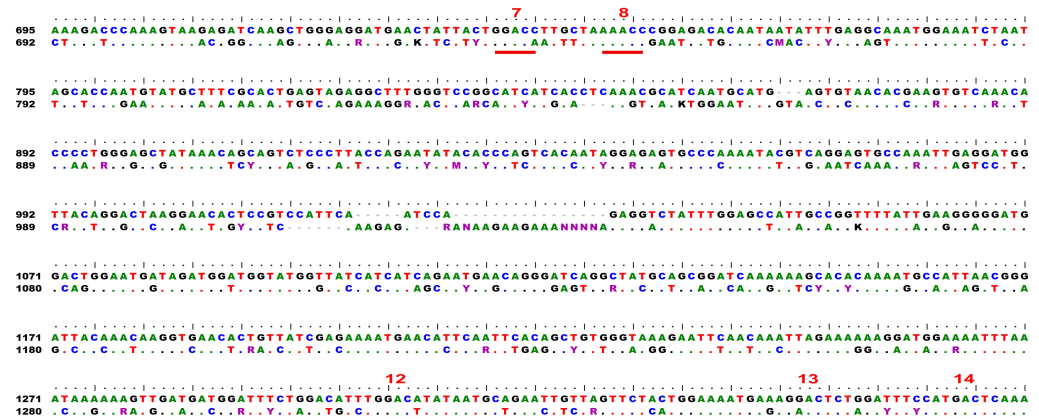

C

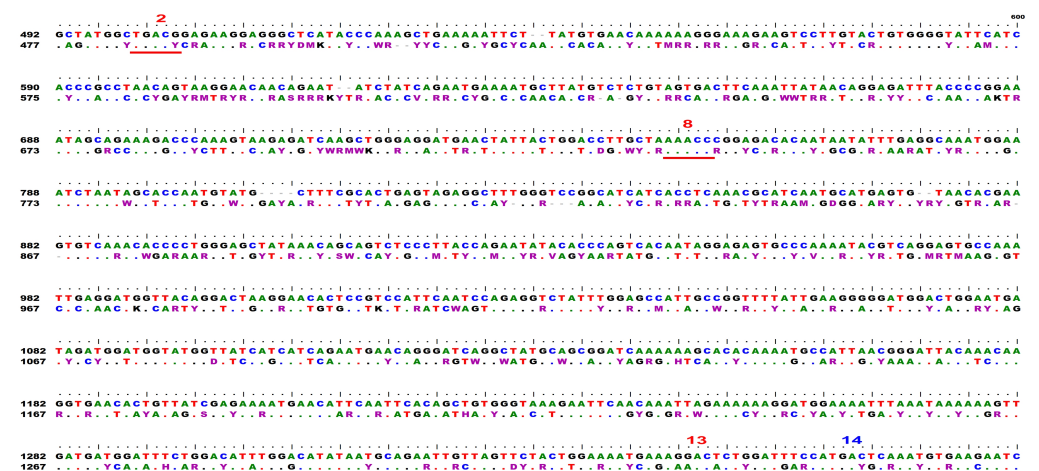

Supplementary Figure 2: DRACH motifs comparison between IAV-PR8 HA mRNA and the consensus sequences of various subtypes. Sequence alignment of the IAV-PR8 HA transcripts and consensus H3 (A), H5 (B), H9 (C) with threshold frequency 85, 75, and 90%, respectively, are indicated. Nucleotide numbers are indicated on the left side. The alignment

was generated using the Clustal W algorithm of the MegAlign program (Lasergene, version 3.18). The conserved DRACH motifs indicated by red underlines and numbers, atypical 14<sup>th</sup> DRACH motif represented by blue underline, and number are indicated (C). Identical residues are indicated by dots and sequence variation is denoted by a typical single-letter code or IUPAC degenerate nucleotide codes; R denotes A or G, Y denotes C or T, S denotes G or C, W denotes A or T, K denotes G or T, M denotes A or C, B denotes C or G or T, D denotes A or G or T, H denotes A or C or T, V denotes A or C or G.

**Supplementary Table 1:** Summary of conserved DRACHs among various species and viruses of H1 located on the vRNA.

| vRNA               | Seq no. | Motif1 | Motif2 | Motif3 | Motif5 | Motif6 | Motif7 | Motif8 | Motif10 | Motif11 | Motif12 |
|--------------------|---------|--------|--------|--------|--------|--------|--------|--------|---------|---------|---------|
| H1                 | 25,576  |        |        | ✓95%   |        | ✓90%   |        |        | ✓95%    |         | ✓90%    |
| Human H1N1         | 16,471  |        |        | ✓99%   |        | ✓99%   |        |        | ✓99%    |         | ✓99%    |
| -Pandemic H1N1     | 10,993  |        | ✓50%   | ✓99%   |        | ✓99%   |        |        | ✓95%    |         | ✓99%    |
| -Non-pandemic H1N1 | 5,490   |        |        | ✓99%   |        | ✓99%   |        |        | ✓99%    |         | ✓99%    |
| Swine H1N1         | 4,366   |        | ✓75%   | ✓99%   |        | ✓85%   |        |        | ✓50%    |         | ✓95%    |
| Human H1N2         | 43      | ✓95%   |        | ✓90%   | ✓90%   | ✓95%   | ✓95%   | ✓95%   | ✓99%    | ✓85%    | ✓99%    |
| Swine H1N2         | 3,614   | ✓85%   |        | ✓95%   |        | ✓95%   | ✓75%   | ✓85%   | ✓95%    | ✓65%    | ✓95%    |
